# Supplementary material for: A Temperature-Dependent Viscoplasticity Model for the Hot Work Steel X38CrMoV5-3, Including Thermal and Cyclic Softening under Thermomechanical Fatigue Loading
Source: MDPI journal article supplement (doi:10.3390/ma16030994), 2023-01-21
Supplement: s1 [file s1]

Article

# A Temperature-Dependent Viscoplasticity Model for the Hot Work Steel X38CrMoV5-3, Including Thermal and Cyclic Softening under Thermomechanical Fatigue Loading

Markus Schlayer <sup>1</sup>, Marc Warwas <sup>2</sup>, Thomas Seifert <sup>1,\*</sup>

<sup>1</sup> Institute for Digital Engineering and Production (IDeEP), Offenburg University of Applied Sciences, Badstraße 24, 77652 Offenburg, Germany

<sup>2</sup> Fraunhofer Institute for Mechanics of Materials IWM, Wöhlerstraße 11, 79108 Freiburg, Germany

\* Correspondence: thomas.seifert@hs-offenburg.de

## Supplementary Data

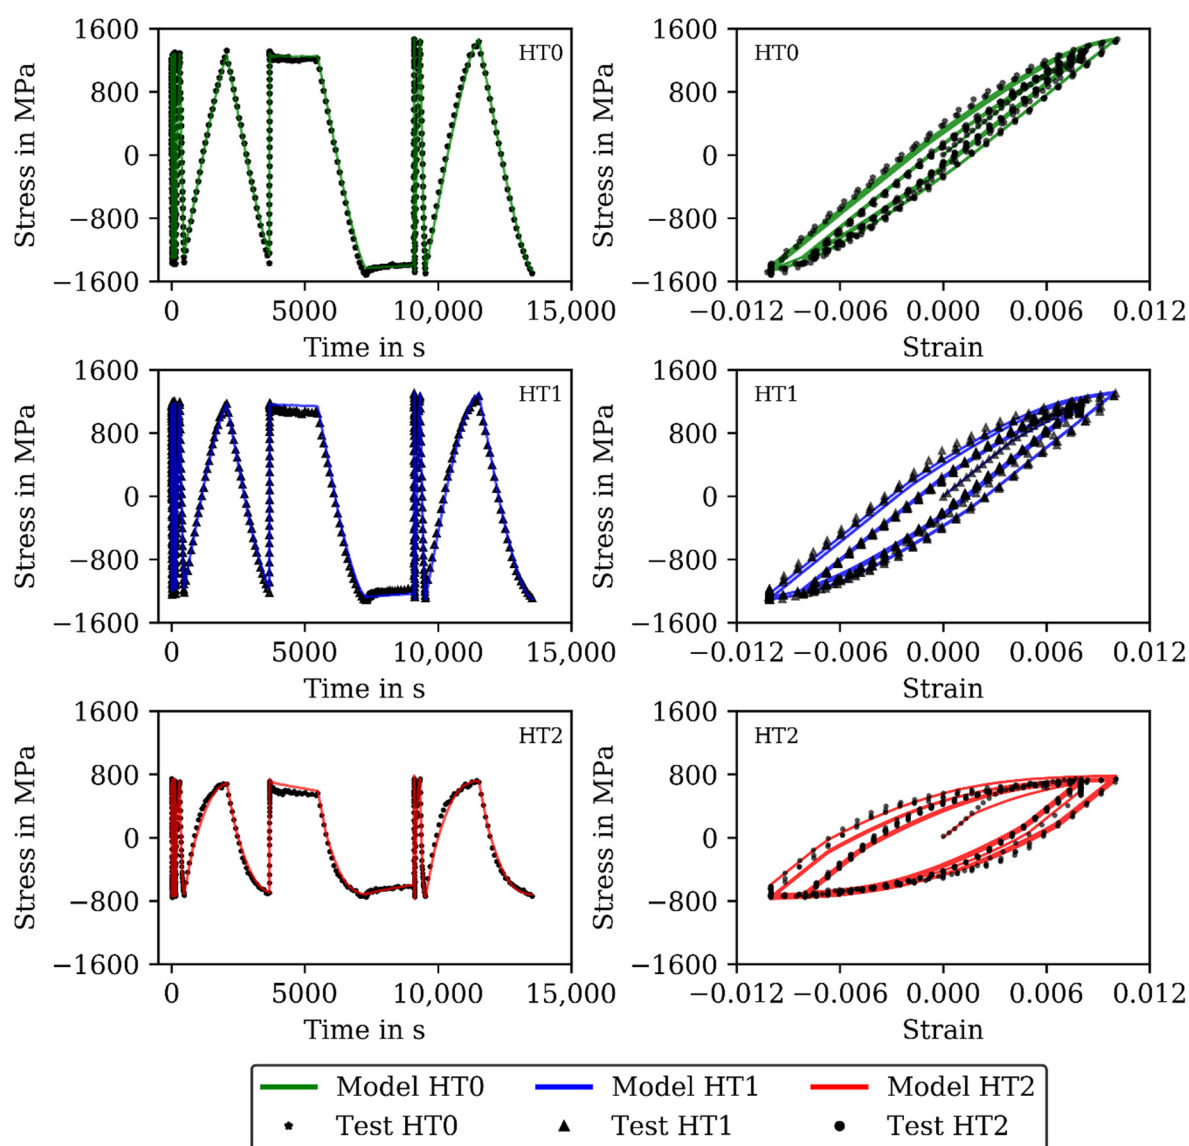

**Figure S1.** Measured stress and stress calculated with the model of step 1 for the initial (11) cycles of the CLCF tests at 400 °C for the HT0, HT1 and HT2 material. Stress-time diagrams (left) and stress-strain hysteresis loops (right).

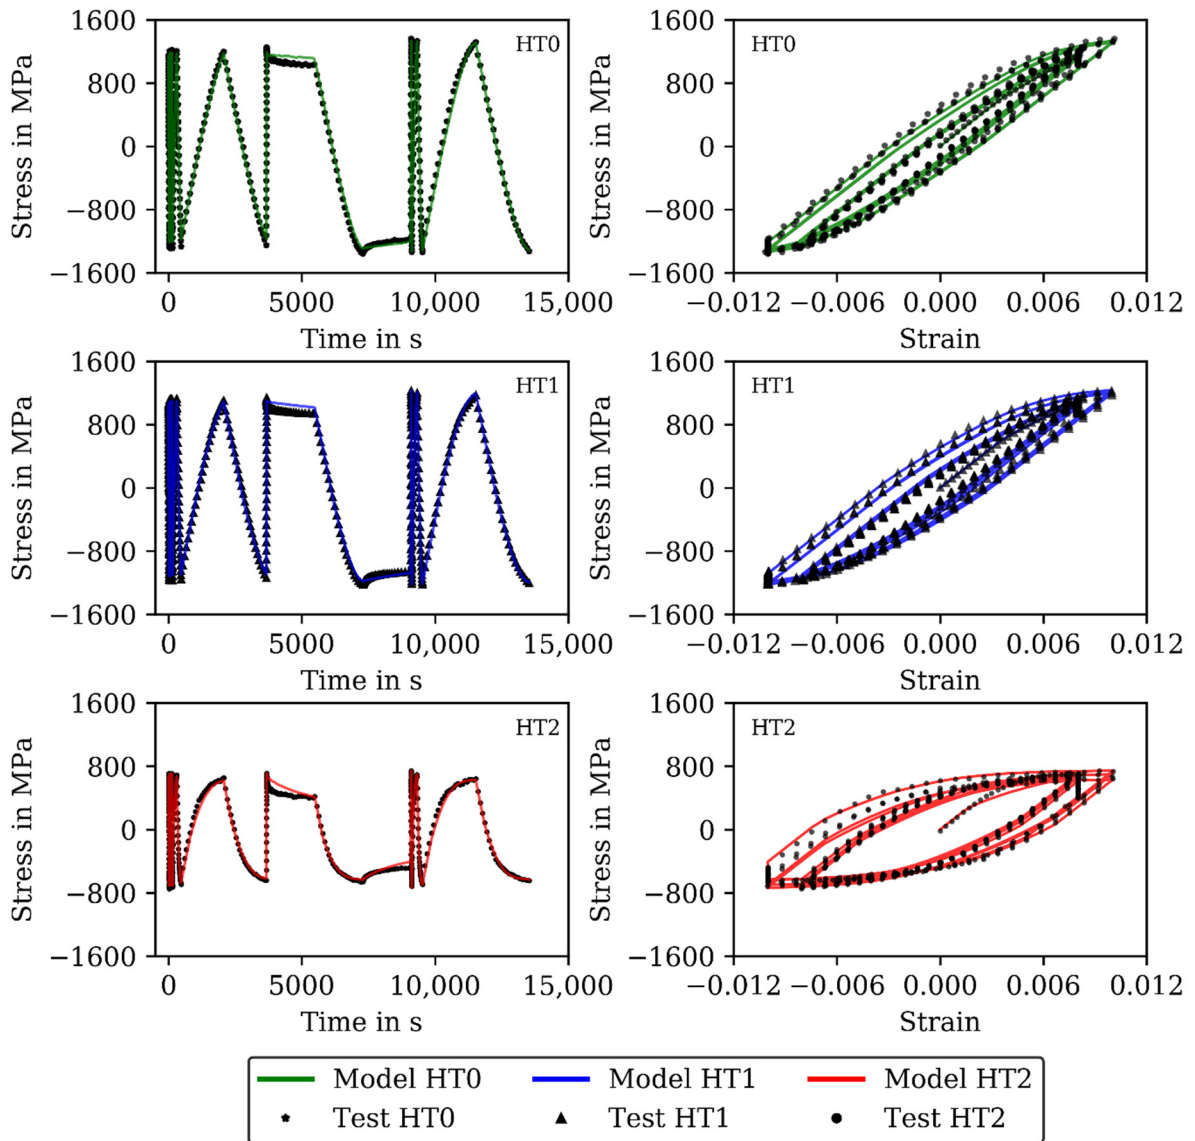

**Figure S2.** Measured stress and stress calculated with the model of step 1 for the initial (11) cycles of the CLCF tests at 500 °C for the HT0, HT1 and HT2 material. Stress-time diagrams (left) and stress-strain hysteresis loops (right).

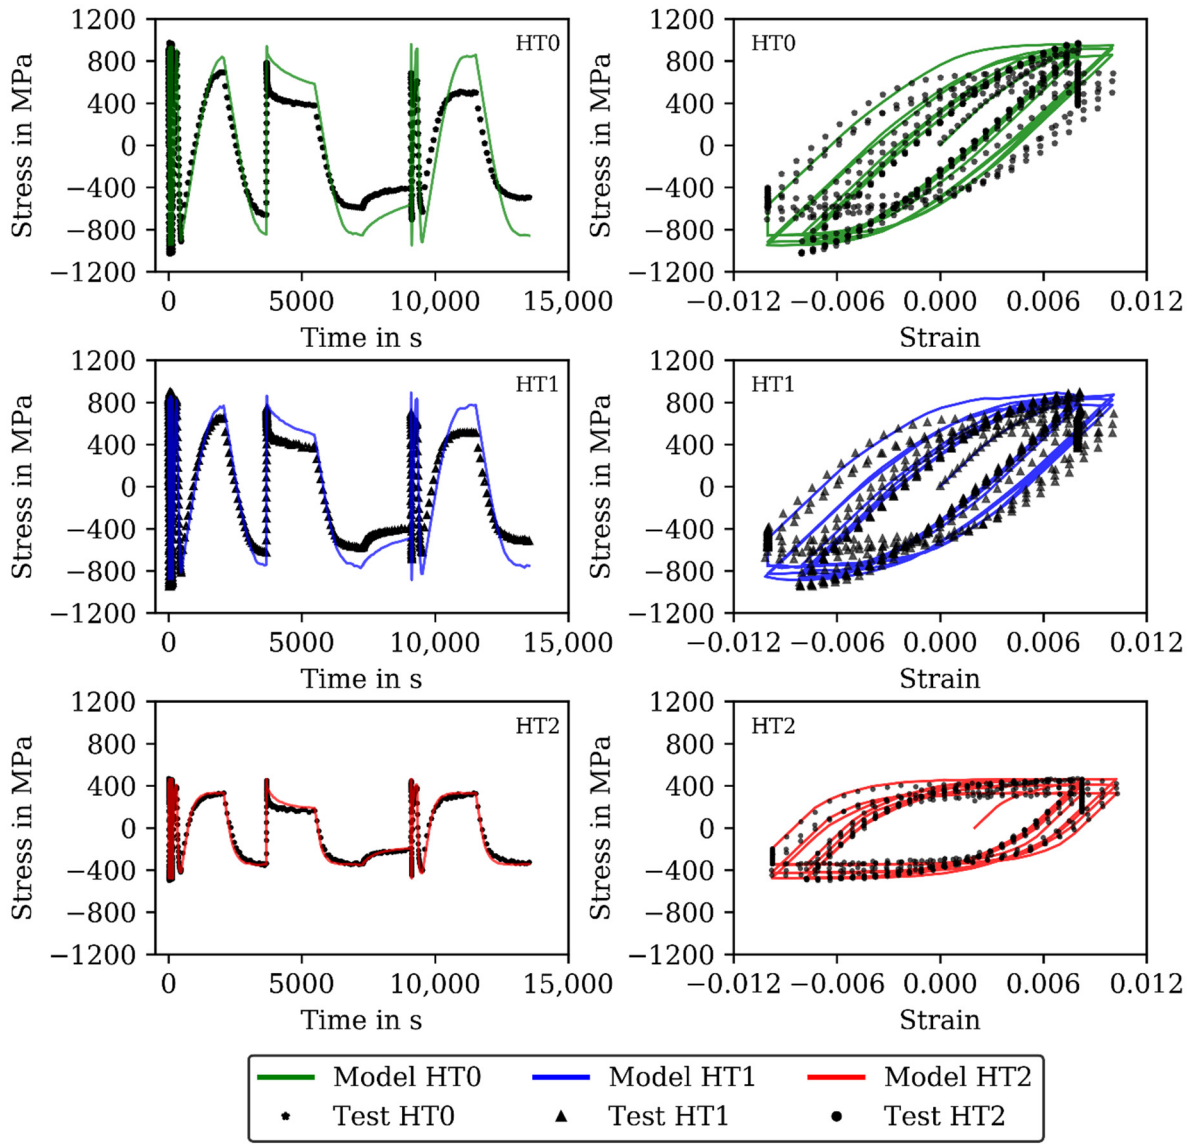

**Figure S3.** Measured stress and stress calculated with the model of step 1 for the initial (11) cycles of the CLCF tests at 600 °C for the HT0, HT1 and HT2 material. Stress-time diagrams (left) and stress-strain hysteresis loops (right).

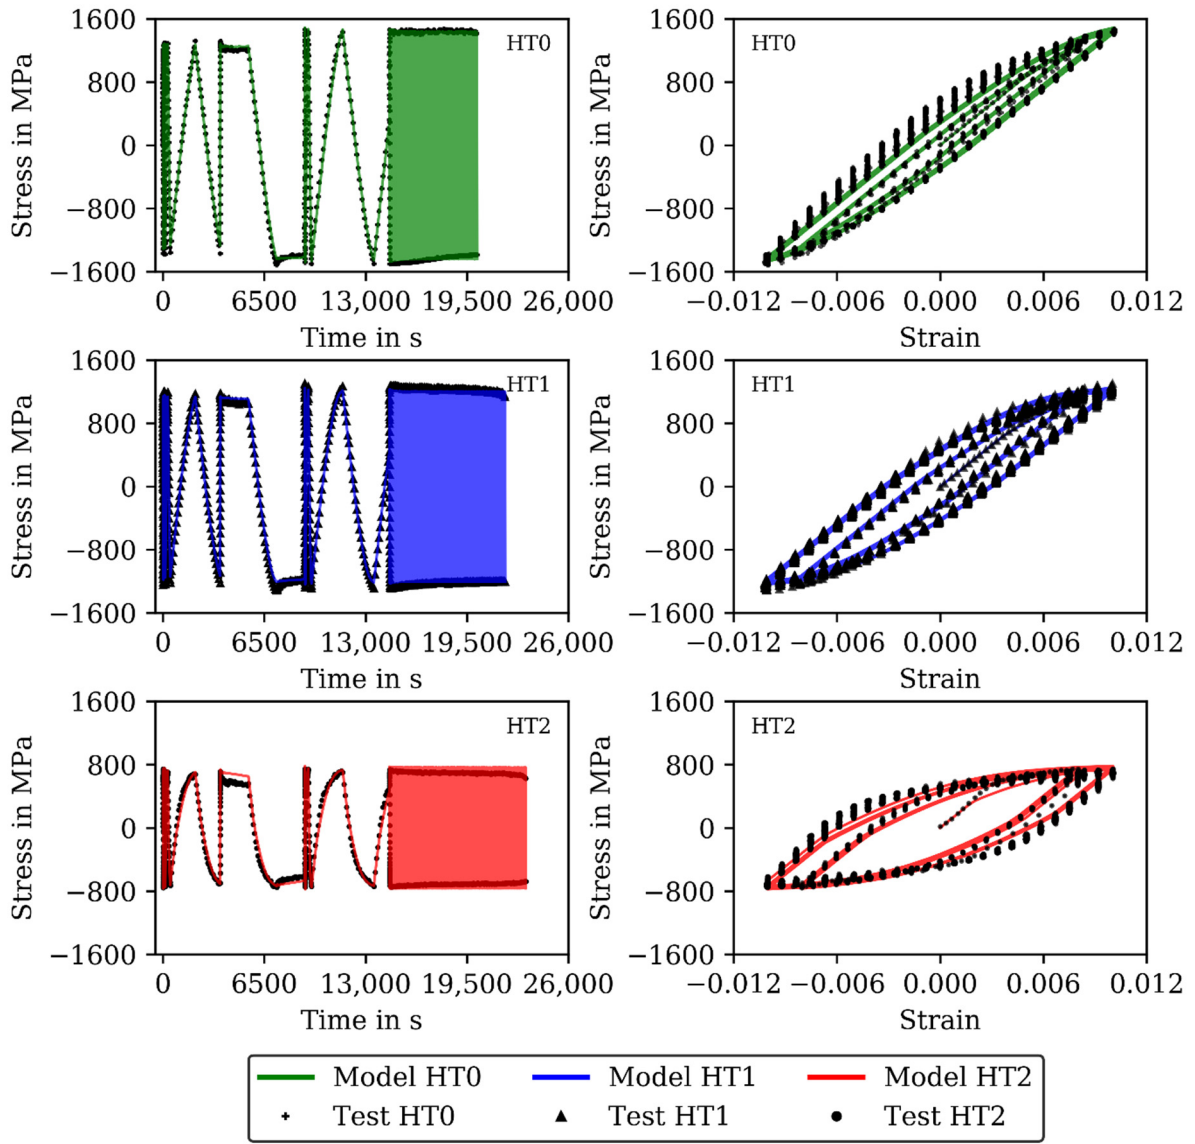

**Figure S4.** Measured stress and stress calculated with the model of step 2 for all cycles to failure of the CLCF tests at 400 °C for the HT0, HT1 and HT2 material. Stress-time diagrams (left) and stress-strain hysteresis loops (right).

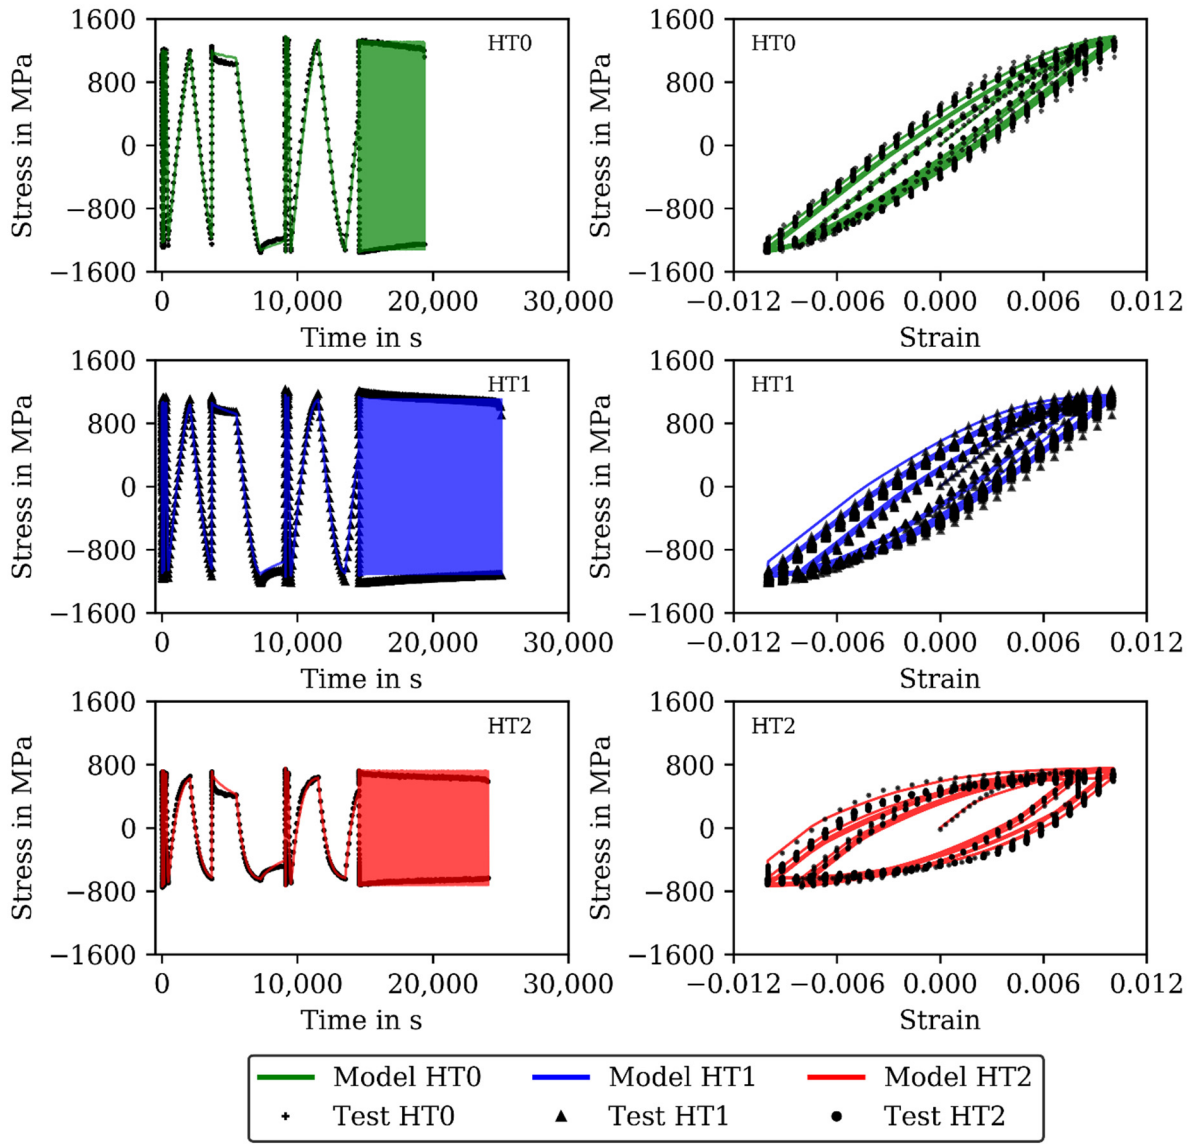

**Figure S5.** Measured stress and stress calculated with the model of step 2 for all cycles to failure of the CLCF tests at 500 °C for the HT0, HT1 and HT2 material. Stress-time diagrams (left) and stress-strain hysteresis loops (right).



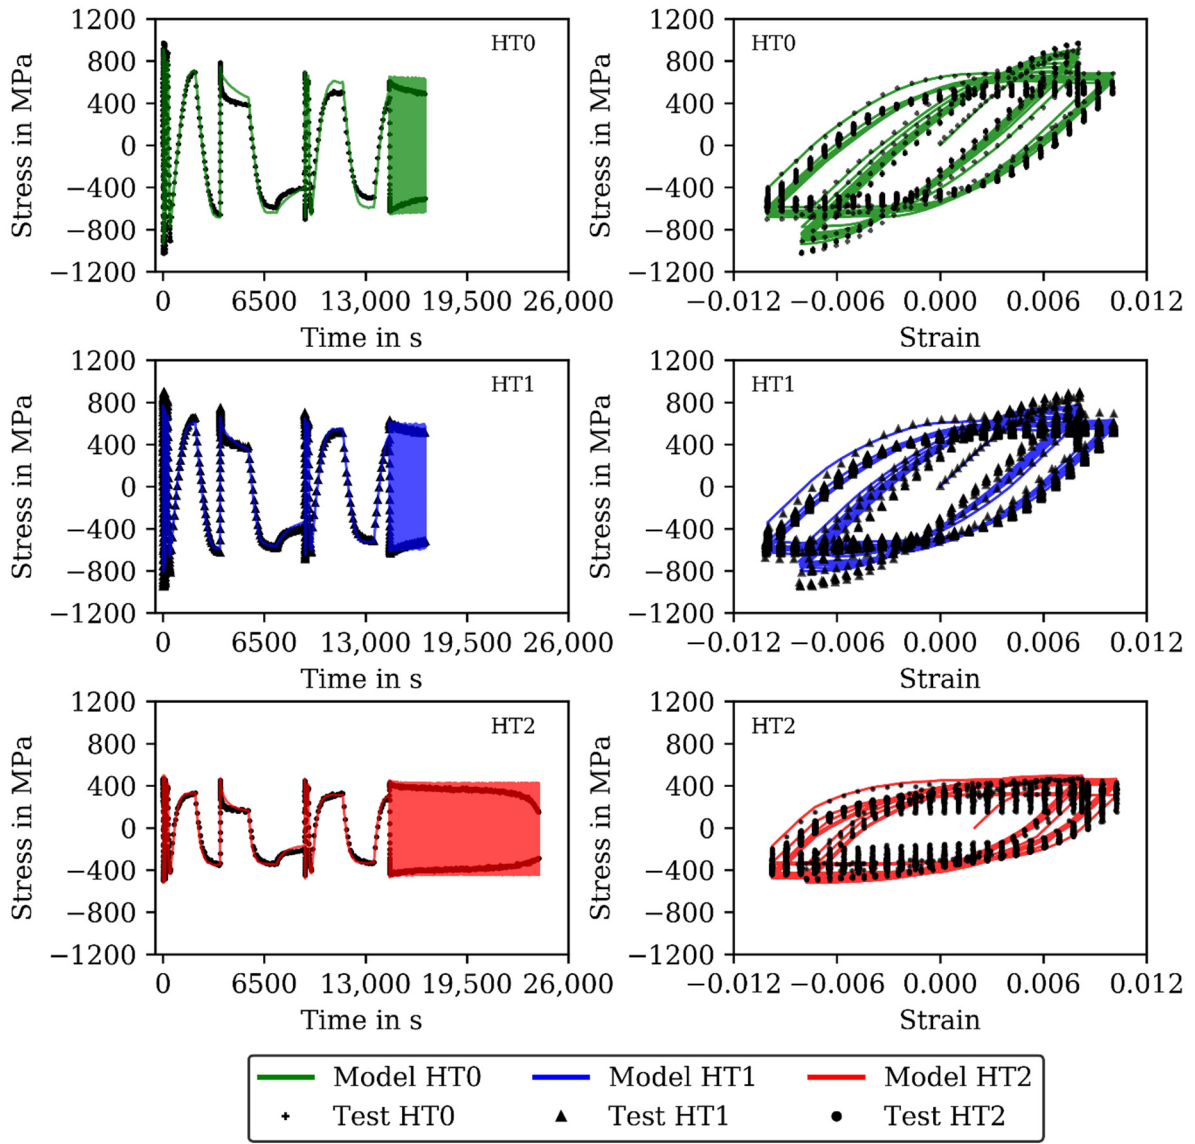

**Figure S6.** Measured stress and stress calculated with the model of step 2 for all cycles to failure of the CLCF tests at 600 °C for the HT0, HT1 and HT2 material. Stress-time diagrams (left) and stress-strain hysteresis loops (right).

**Table S1.** Individually determined material properties of step 1 for 20, 400, 500, 600 and 650 °C for the heat treatments HT0, HT1 and HT2 without thermal and cyclic softening.

| Temperature in °C | Heat Treatment | E in MPa              | R <sub>e</sub> in MPa | C in MPa              | C <sub>∞</sub> in MPa | K in MPa | n | R                     |
|-------------------|----------------|-----------------------|-----------------------|-----------------------|-----------------------|----------|---|-----------------------|
| 20 °C             | HT0            | 2.10· 10 <sup>5</sup> | 1009                  | 9.50· 10 <sup>5</sup> | 880                   | 10       | 8 | 1.0· 10 <sup>-5</sup> |
|                   | HT1            | 2.10· 10 <sup>5</sup> | 790                   | 6.33· 10 <sup>5</sup> | 870                   | 10       | 7 | 2.0· 10 <sup>-5</sup> |
|                   | HT2            | 2.10· 10 <sup>5</sup> | 416                   | 2.00· 10 <sup>5</sup> | 520                   | 90       | 3 | 1.0· 10 <sup>-5</sup> |
| 400 °C            | HT0            | 1.75· 10 <sup>5</sup> | 771                   | 8.48· 10 <sup>5</sup> | 750                   | 10       | 8 | 5.0· 10 <sup>-5</sup> |
|                   | HT1            | 1.75· 10 <sup>5</sup> | 703                   | 4.70· 10 <sup>5</sup> | 650                   | 10       | 7 | 6.0· 10 <sup>-5</sup> |
|                   | HT2            | 1.75· 10 <sup>5</sup> | 260                   | 2.00· 10 <sup>5</sup> | 490                   | 436      | 3 | 2.0· 10 <sup>-4</sup> |
| 500 °C            | HT0            | 1.70· 10 <sup>5</sup> | 585                   | 7.48· 10 <sup>5</sup> | 750                   | 60       | 8 | 1.0· 10 <sup>-4</sup> |
|                   | HT1            | 1.70· 10 <sup>5</sup> | 571                   | 4.70· 10 <sup>5</sup> | 650                   | 104      | 7 | 1.5· 10 <sup>-4</sup> |
|                   | HT2            | 1.70· 10 <sup>5</sup> | 230                   | 2.00· 10 <sup>5</sup> | 460                   | 600      | 3 | 7.0· 10 <sup>-4</sup> |
| 600 °C            | HT0            | 1.55· 10 <sup>5</sup> | 300                   | 6.20· 10 <sup>5</sup> | 528                   | 300      | 8 | 1.1· 10 <sup>-3</sup> |
|                   | HT1            | 1.55· 10 <sup>5</sup> | 263                   | 4.70· 10 <sup>5</sup> | 466                   | 400      | 7 | 1.1· 10 <sup>-3</sup> |
|                   | HT2            | 1.55· 10 <sup>5</sup> | 178                   | 1.30· 10 <sup>5</sup> | 203                   | 845      | 3 | 3.0· 10 <sup>-3</sup> |
| 650 °C            | HT0            | 1.47· 10 <sup>5</sup> | 120                   | 3.03· 10 <sup>5</sup> | 324                   | 450      | 8 | 2.1· 10 <sup>-3</sup> |
|                   | HT1            | 1.47· 10 <sup>5</sup> | 120                   | 1.30· 10 <sup>5</sup> | 190                   | 500      | 7 | 2.1· 10 <sup>-3</sup> |
|                   | HT2            | 1.47· 10 <sup>5</sup> | 120                   | 1.30· 10 <sup>5</sup> | 190                   | 1000     | 3 | 4.0· 10 <sup>-3</sup> |

**Table S2.** Compiled material properties of step 2 for 20, 400, 500, 600 and 650 °C for the heat treatments HT0, HT1 and HT2 with thermal and cyclic softening.

| Temperature in °C | Heat Treatment | R <sub>0</sub> in MPa | R <sub>s</sub> in MPa | K <sub>0</sub> in MPa | K <sub>s</sub> in MPa | p <sub>0</sub> | s <sub>∞</sub> |
|-------------------|----------------|-----------------------|-----------------------|-----------------------|-----------------------|----------------|----------------|
| 20 °C             | HT0            | 375                   | 635                   | 19                    | 31                    | 0.09           | 0.20           |
|                   | HT1            | 301                   | 477                   | 44                    | 61                    | 0.09           | 0.20           |
|                   | HT2            | 184                   | 228                   | 197                   | 242                   | 0.12           | 0.20           |
| 400 °C            | HT0            | 328                   | 500                   | 19                    | 30                    | 0.08           | 0.20           |
|                   | HT1            | 233                   | 391                   | 26                    | 77                    | 0.08           | 0.20           |
|                   | HT2            | 83                    | 221                   | 67                    | 371                   | 0.10           | 0.20           |
| 500 °C            | HT0            | 236                   | 400                   | 18                    | 31                    | 0.07           | 0.30           |
|                   | HT1            | 167                   | 322                   | 28                    | 100                   | 0.08           | 0.30           |
|                   | HT2            | 60                    | 200                   | 85                    | 527                   | 0.13           | 0.30           |
| 600 °C            | HT0            | 71                    | 287                   | 1                     | 311                   | 0.05           | 0.60           |
|                   | HT1            | 51                    | 240                   | 11                    | 376                   | 0.07           | 0.50           |
|                   | HT2            | 19                    | 165                   | 77                    | 781                   | 0.20           | 0.35           |
| 650 °C            | HT0            | 17                    | 146                   | 4                     | 439                   | 0.20           | 0.90           |
|                   | HT1            | 14                    | 137                   | 12                    | 509                   | 0.21           | 0.80           |
|                   | HT2            | 10                    | 124                   | 65                    | 945                   | 0.25           | 0.60           |
